# Supplementary material
Source: publisher site journal article supplement (https://static.cambridge.org/content/id/urn:cambridge.org:id:article:S0899823X18003471/resource/name/S0899823X18003471supp001.pdf)
Supplement: Supplementary file 1 [file S0899823X18003471supp001.pdf]

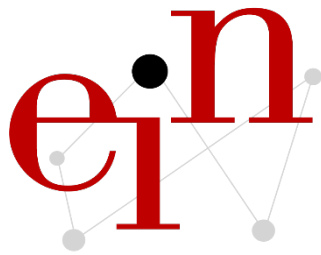

## INFECTIOUS DISEASES SOCIETY OF AMERICA EMERGING INFECTIONS NETWORK QUERY:

### Pediatric Asymptomatic *C. difficile* Carriage

With increasing recognition of asymptomatic *Clostridium difficile* carriage among several infant and non-infant pediatric populations, questions have risen regarding whether screening for carriage plays a role in *C. difficile* infection (CDI) prevention. Although there are no current recommendations regarding testing, management, or benefit of infection control measures for such patients, there are anecdotal reports of practice variation.

**The purpose of this survey is to understand current practices regarding pediatric patients with asymptomatic *C. difficile* carriage.**

If you see pediatric patients at more than one institution, please respond based on your experience with your primary hospital (the institution at which you spend the most time).

#### References:

- Longtin Y, Paquet-Bolduc B, Gilca R, et al. Effect of detecting and isolating *Clostridium difficile* carriers at hospital admission on the incidence of *C difficile* infections: a quasi-experimental controlled study. *JAMA Intern Med* 2016;176:796–804.
- Hourigan SK, Chirumamilla SR, Ross T, et al. *Clostridium difficile* carriage and serum antitoxin responses in children with inflammatory bowel disease. *Inflamm Bowel Dis* 2013;19(13):2744-52.
- Dominguez SR, Dolan SA, West, K, et al. High colonization rate and prolonged shedding of *Clostridium difficile* in pediatric oncology patients. *Clin Infect Dis* 2014;59(3):401-3.
- Leibowitz J, Soma VL, Rosen L, et al. Similar proportions of stool specimens from hospitalized children with and without diarrhea test positive for *Clostridium difficile*. *Pediatr Infect Dis J* 2015;34(3):261-6.

*Thank you for completing this survey. Please fax to 319-384-8860.*

**EMERGING INFECTIONS NETWORK QUERY**  
**Pediatric Asymptomatic *C. difficile* Carriage**

Name: \_\_\_\_\_

**1. What test(s) are used to diagnose CDI in your primary hospital? [Select all that apply]**

Single test

- C. difficile* included in a GI panel of multiple pathogens (e.g. Biofire)
- Nucleic acid amplification test (NAAT) only, e.g. PCR or LAMP
- Enzyme immunoassay (EIA) for toxin only
- Combined EIA for glutamate dehydrogenase (GDH) assay and toxin
- Toxigenic culture (*C. difficile* culture followed by detection of toxins)

Multi-step algorithm

- GDH EIA followed by cell cytotoxicity neutralization assay or toxin EIA (if GDH positive)
- GDH EIA followed by NAAT (if GDH positive)
- NAAT followed by EIA for toxin (if NAAT positive)
- Combined GDH/toxin EIA, followed by NAAT for discrepant results
- Other, *specify*:
- Not sure

**2. Does your primary hospital restrict *C. difficile* testing only to unformed stools?**     Yes     No

**3. Does your primary hospital have age restrictions for *C. difficile* testing?**

- Yes, we only test stools from children > \_\_\_\_\_ months of age [*Please specify age in months*]
- No, we do not have age restrictions for *C. difficile* testing

**4. Which of the following statements applies to your institution's use of a multiplex GI PCR panel?**

- We do not use a multiplex PCR panel to diagnose any GI pathogens
- We use panel only for non-*C. difficile* pathogens; *C. difficile* results are always suppressed
- We suppress the *C. difficile* result unless *C. difficile* testing is specifically requested by the clinician
- We report the *C. difficile* result from this panel even if *C. difficile* testing is not requested
- Not sure

**5a. Are patients in your NICU tested for *C. difficile*? [Select all that apply]**

- Yes, NICU patients may be tested for *C. difficile* asymptomatic carriage
- Yes, NICU patients may be tested for CDI (i.e. diarrheal illness caused by *C. difficile*)
- No, patients in the NICU are not tested for *C. difficile*
- Not applicable- there is not a NICU where I work

**b. If yes, how are NICU patients testing positive managed? [Select all that apply]**

- Contact isolation
- Requirement for single patient room or patient cohorting
- Antibiotic treatment to eradicate *C. difficile* carriage
- Antibiotic treatment for CDI (i.e., diarrheal illness caused by *C. difficile*)

**6. In your primary hospital, are pediatric patients tested for asymptomatic carriage of *C. difficile*?**

- Yes, we test children for carriage irrespective of age
- Yes, we only test infants for carriage
- Yes, we only test non-infant children for carriage
- No, we do not test any patients for asymptomatic carriage- **STOP HERE. Thank you.**

*Thank you for completing this survey. Please fax to 319-384-8860.*

- 7. What type(s) of patients are tested for asymptomatic carriage?** [Select all that apply]
- Malignancy or bone marrow transplant patient
  - Other immunodeficiency (e.g., patient with organ transplant or primary immunodeficiency patient)
  - Inflammatory bowel disease (IBD) or other non-IBD gastrointestinal conditions
  - Recent history of CDI
  - Other, *specify*:
  - Not sure

- 8. Do any of the following actions occur when asymptomatic carriage of *C. difficile* is detected?** [Select all that apply]
- Gloves required prior to patient contact
  - Gowns required prior to patient contact
  - Requirement for single patient room
  - Patient cohorting
  - Bedside commode or dedicated toilet facilities
  - Enhanced environmental cleaning (e.g., frequency and/or type of disinfectant)
  - Antibiotic treatment to eradicate *C. difficile* carriage and/or prevent CDI  
*Specify which antibiotic is most commonly prescribed:*
  - Administration of probiotics
  - None of the above
  - Other, *specify*:
  - Not sure

- 9. What actions are taken if a known asymptomatic carrier subsequently develops diarrhea?** [Select all that apply]
- Repeat *C. difficile* testing
  - Empiric CDI treatment without repeat testing
  - Depends on suspicion of other causes of diarrhea
  - Other, *specify*:

- 10a. Are asymptomatic carriers reported to the National Healthcare Safety Network (NHSN)?**
- Yes       No       Not sure

- b. If YES, WHEN are asymptomatic carriers reported to NHSN?**
- While asymptomatic
  - Whenever they become symptomatic
  - Not sure

**11. Additional comments about this survey or about asymptomatic carriage and testing:**
